# Supplementary material for: Toxoplasma gondii SAG1 targeting host cell S100A6 for parasite invasion and host immunity
Source: PubMed Central journal article supplement — iScience. 2021 Nov 26;24(12):103514. doi: 10.1016/j.isci.2021.103514 (PMC8671940; doi:10.1016/j.isci.2021.103514), 2021-11-26
Supplement: mmc1.pdf [file mmc1.pdf]

iScience, Volume 24

**Supplemental information**

***Toxoplasma gondii* SAG1 targeting**

**host cell S100A6 for parasite**

**invasion and host immunity**

**Li-Juan Zhou, Jiao Peng, Min Chen, Li-Jie Yao, Wei Hao Zou, Cynthia Y. He, and Hong-Juan Peng**

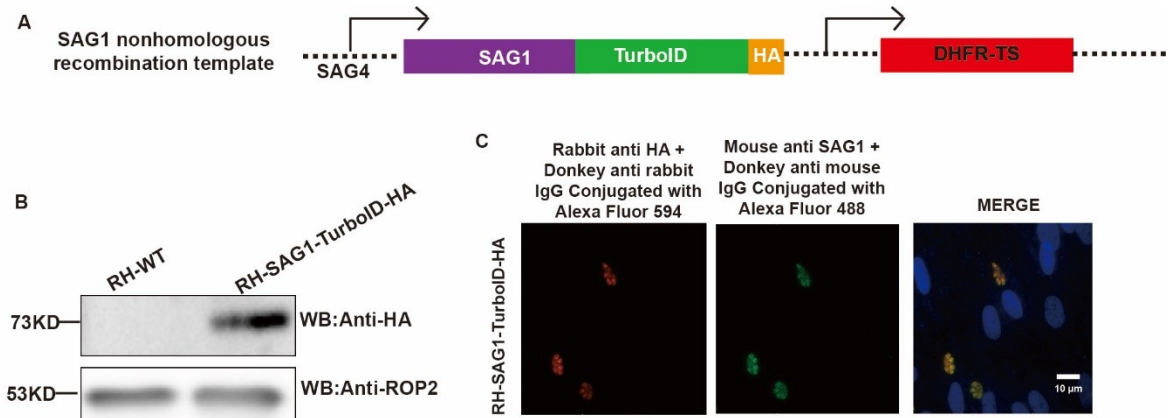

**Figure S1. Construction and Identification of RH-SAG1-TurboID-HA strain, Related to Figure 1** (A) Diagram of the nonhomologous recombination template: a reading frame composed of the SAG4 promoter followed by SAG1-TurboID-HA coding sequence, and the coding sequence of dihydrofolate reductase-thymidylate synthase conferring pyrimethamine resistance. (B) WB detection of the expression of SAG1-TurboID-HA with the whole-cell lysates of RH-WT and RH-SAG1-TurboID-HA parasites. HA antibody was used to detect SAG1-TurboID-HA (73 KD), ROP2 (53 KD) was used as a loading control. (C) Detection of the localization and colocalization of SAG1 and SAG1-TurboID-HA with IFA. The nuclei were visualized with Alexa Fluor-405, SAG1 was visualized with Alexa Fluor-488, and HA-tag was visualized with Alexa Fluor-594 (scale bars, 10 $\mu$ m).

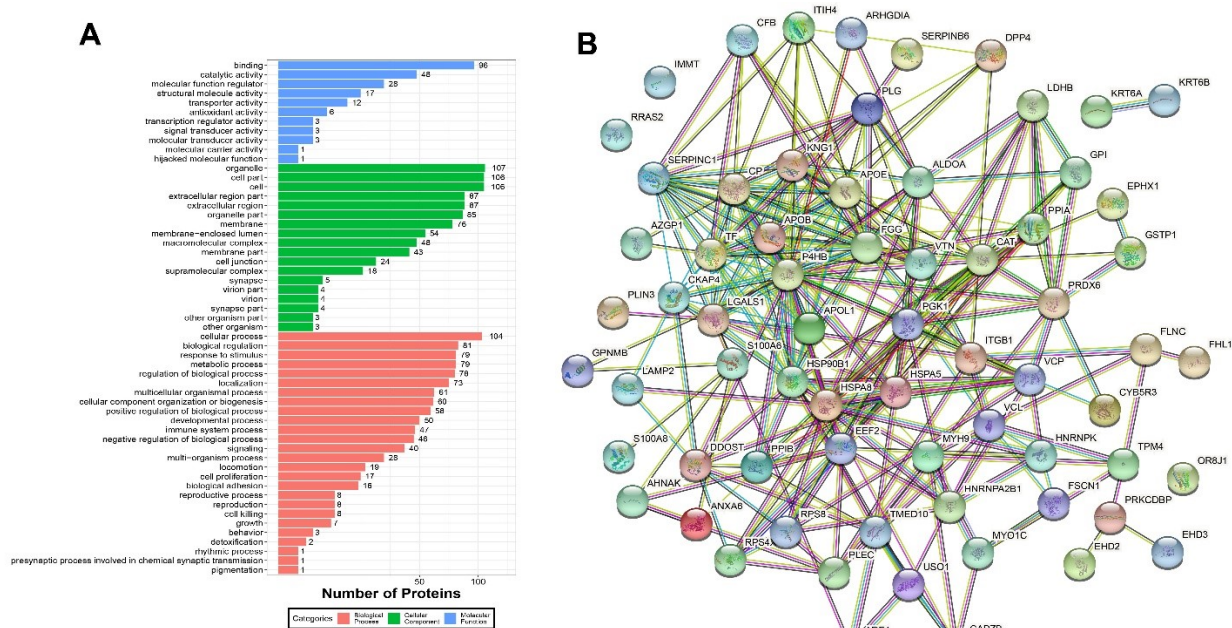

**Figure S2. Gene Ontology (GO) and Protein-Protein Interaction (PPI) analysis for the *TgSAG1* interactome, Related to Figure 2 (A)** GO analysis showed the 119 *TgSAG1* interaction proteins were enriched into 3 GO categories: biological processes, cellular components, and molecular functions. The cellular process, organelles, and binding are the mostly enriched groups for these three categories, respectively. (B) PPI analysis for the 76 *TgSAG1* candidate interactive membrane proteins using STRING 11.0 (<http://string-db.org/>). Criteria for interactions are shown by colored lines as follows: red line, gene fusion events; green line, gene neighborhood; blue line, gene cooccurrence; purple line, experimental evidence; yellow line, text mining; light blue line, database; black line, co-expression.

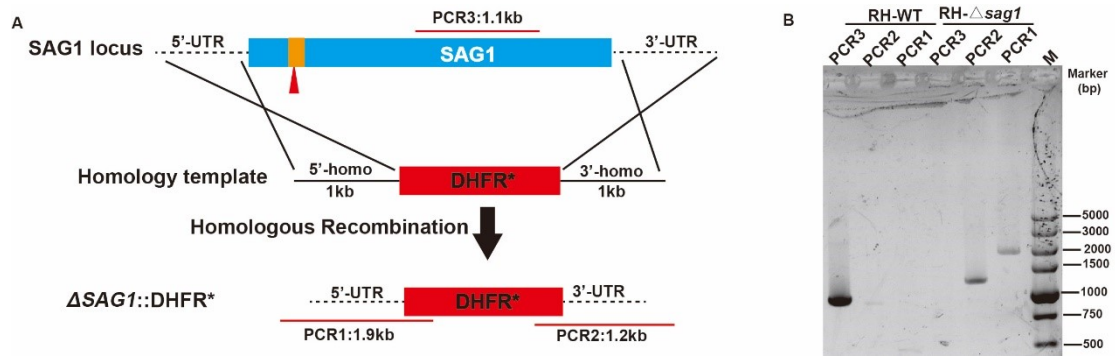

**Figure S3. CRISPR/Cas9-mediated gene disruption of the SAG1 locus, Related to Figure 6, Figure 7 and Figure 8** (A) Schematic of the CRISPR/Cas9 strategy used to inactivate *sag1* by insertion of pyrimethamine-resistant DHFR (DHFR\*). (B) Verification PCR demonstrating the homologous integration of DHFR and gene disruption of *sag1* in a representative clone, compared with its parental RH tachyzoites.

**Table S1. Gene name and primers used in qRT-PCR analysis or RNAi transfection. Related Figure 7**

| Gene          | Primer name*      | Primer sequence (5' to 3')       |
|---------------|-------------------|----------------------------------|
| Vimentin      | Vimentin-h-F      | 5'-CACTGAGTACCGGAGACAGG-3'       |
|               | Vimentin-h-R      | 5'-GAAGGTGACGAGCCATTTCC-3'       |
| S100A6        | S100A6-h-F        | 5'-AAGGCTGATGGAAGACTTGG-3'       |
|               | S100A6-h-R        | 5'-CCTTGAGGGCTTCATTGTAGAT-3'     |
| IL-12         | IL12-h-F          | 5'-GATGTACCAGGTGGAGTTCAAG        |
|               | IL12-h-R          | 5'-GCCTGCATCAGCTCATCAATA-3'      |
| TNF- $\alpha$ | TNF $\alpha$ -h-F | 5'-CCAGGGACCTCTCTCTAATCA-3'      |
|               | TNF $\alpha$ -h-R | 5'-TCAGCTTGAGGGTTTGCTAC-3'       |
| IFN- $\gamma$ | IFN $\gamma$ -h-F | 5'-GTGAAGACCTCTGTACCAAGA-3'      |
|               | IFN $\gamma$ -h-R | 5'-CATTGAGAGCTGGCTCCTTTA-3'      |
| GAPDH         | GAPDH-h-F         | 5'-GTCAACGGATTTGGTCGTATTG-3'     |
|               | GAPDH-h-R         | 5'-TGTAGTTGAGGTCAATGAAGGG-3'     |
| TNF- $\alpha$ | TNF $\alpha$ -m-F | 5'-TTGTCTACTCCCAGGTTCTCT-3'      |
|               | TNF $\alpha$ -m-R | 5'-GAGGTTGACTTTCTCCTGGTATG-3'    |
| Actin         | Actin-m-F         | 5'-GCCTTCCTTCTTGGGTATGGAA-3'     |
|               | Actin-m-R         | 5'-CAGCTCAGTAACAGTCCGCC-3'       |
| S100A6        | S100A6 siRNA 1    | 5'-GCAGGATGCTGAAATTGCA-3'        |
|               | S100A6 siRNA 2    | 5'-TGGCCATCTTCCACAAGTA-3'        |
|               | S100A6 siRNA 3    | 5'-GGCTGATGGAAGACTTGGA-3'        |
| Vimentin      | Vimentin siRNA 1  | 5'-CAGACAGGATGTTGACAATGCGTCT-3'  |
|               | Vimentin siRNA 2  | 5'-TTTGC GTTCAAGGTCAAGACGTGCC-3' |
|               | Vimentin siRNA 3  | 5'-TTGATAACCTGTCCATCTCTAGTTT-3'  |

\*Forward (F) and reverse (R) primers. h: Human, m: Mouse
